# Supplementary material for: Overview of Metabolomic Analysis and the Integration with Multi-Omics for Economic Traits in Cattle
Source: MDPI journal article supplement (doi:10.3390/metabo11110753), 2021-10-30
Supplement: s1 [file s1]

**Supplementary Table S1.** Significantly metabolic pathways (FDR < 0.05) for the metabolites associated with feed efficiency using *Bos taurus* as the library.

| Pathway name                                        | Matched metabolite ratio | Metabolite                                                     | P-value               | -Log(P-value) | False discovery rate (FDR) | Pathway impact value |
|-----------------------------------------------------|--------------------------|----------------------------------------------------------------|-----------------------|---------------|----------------------------|----------------------|
| Aminoacyl-tRNA biosynthesis                         | 6/48                     | Glutamate, Glycine, Lysine, Phenylalanine, Threonine, Tyrosine | $3.78 \times 10^{-5}$ | 4.42          | $2.64 \times 10^{-3}$      | 0                    |
| Glyoxylate and dicarboxylate metabolism             | 5/32                     | Acetate, Citrate, Formate, Glutamate, Glycine                  | $6.28 \times 10^{-5}$ | 4.20          | $2.64 \times 10^{-3}$      | 0.138                |
| Phenylalanine metabolism                            | 3/12                     | Hippurate, Phenylalanine, Tyrosine                             | $5.41 \times 10^{-4}$ | 3.27          | 0.0115                     | 0.357                |
| Alanine, aspartate and glutamate metabolism         | 4/28                     | $\alpha$ -ketoglutarate, Citrate, Glutamate, Succinate         | $5.48 \times 10^{-4}$ | 3.26          | 0.0115                     | 0.245                |
| Butanoate metabolism                                | 3/15                     | $\alpha$ -ketoglutarate, Glutamate, Succinate                  | $1.09 \times 10^{-3}$ | 2.96          | 0.0143                     | 0                    |
| Glycine, serine and threonine metabolism            | 4/34                     | Betaine, Creatine, Glycine, Threonine                          | $1.17 \times 10^{-3}$ | 2.93          | 0.0143                     | 0.342                |
| Phenylalanine, tyrosine and tryptophan biosynthesis | 2/4                      | Phenylalanine, Tyrosine                                        | $1.19 \times 10^{-3}$ | 2.92          | 0.0143                     | 1.0                  |
| D-Glutamine and D-glutamate metabolism              | 2/5                      | $\alpha$ -ketoglutarate, Glutamate                             | $1.97 \times 10^{-3}$ | 2.71          | 0.0207                     | 1.0                  |
| Citrate cycle (TCA cycle)                           | 3/20                     | $\alpha$ -ketoglutarate, Citrate, Succinate                    | $2.60 \times 10^{-3}$ | 2.59          | 0.0243                     | 0.182                |

Note: The pathway impact value is calculated using the sum of importance measures of the matched metabolites divided by the sum of the importance measures of all metabolites.
